# Supplementary material for: The quality of antiretroviral medicines: an uncertain problem
Source: HighWire-hosted journal article supplement (doi:10.1136/bmjgh-2022-011423), 2023-03-01
Supplement: bmjgh-2022-011423supp002_data_supplement.pdf [file bmjgh-2022-011423supp002_data_supplement.pdf]

## Supplementary file 2. Websites used for information gathering about substandard and falsified antiretroviral medicines

|                                                              | Websites names and hyperlinks                                                        |                                                                 | Websites names and hyperlinks                                                                                   |
|--------------------------------------------------------------|--------------------------------------------------------------------------------------|-----------------------------------------------------------------|-----------------------------------------------------------------------------------------------------------------|
| <b>International Organisations and NGOs</b>                  | <a href="#">++ Health Action International ++</a>                                    | <b>Medicine Regulatory Authorities and national bodies</b>      | <a href="#">Centers for Disease Control and Prevention</a>                                                      |
|                                                              | <a href="#">ACG - Anti-counterfeting group</a>                                       |                                                                 | <a href="#">Comité national anti-contrefaçon</a>                                                                |
|                                                              | <a href="#">Coalition Against Illicit Trade</a>                                      |                                                                 | <a href="#">Fraud.org</a>                                                                                       |
|                                                              | <a href="#">EAASM-European Alliance for Access to Safe Medicines</a>                 |                                                                 | <a href="#">NAFDAC Nigeria</a>                                                                                  |
|                                                              | <a href="#">Fondation Chirac - Agir au service de la paix</a>                        |                                                                 | <a href="#">Ghana FDA</a>                                                                                       |
|                                                              | <a href="#">GACG Global Anti-Counterfeiting Network</a>                              |                                                                 | <a href="#">HSA Health Sciences Authority Singapore</a>                                                         |
|                                                              | <a href="#">GPHF The Global Pharma Health Fund</a>                                   |                                                                 | <a href="#">Medicines and Healthcare products Regulatory Agency, UK Government</a>                              |
|                                                              | <a href="#">IACC-International AntiCounterfeiting Coalition</a>                      |                                                                 | <a href="#">US Food and Drug Administration</a>                                                                 |
|                                                              | <a href="#">Medical Products Counterfeiting and Pharmaceutical Crime ( INTERPOL)</a> |                                                                 | <a href="#">Kenya Pharmacy and poisons Board</a>                                                                |
|                                                              | <a href="#">IRACM Institut de Recherche Anti-Contrefaçon de Médicaments</a>          |                                                                 | <a href="#">Central Drugs Standard Control Organization</a>                                                     |
|                                                              | <a href="#">L'Office des Nations unies contre la drogue et le crime</a>              | <a href="#">Ordre national des pharmaciens de côte d'ivoire</a> |                                                                                                                 |
|                                                              | <a href="#">MIMS</a>                                                                 |                                                                 |                                                                                                                 |
|                                                              | <a href="#">MSF Access Campaign msfaccess.org</a>                                    | <b>Alert lists and systems</b>                                  | <a href="#">Campaign for Safe Medicines in Kenya</a>                                                            |
|                                                              | <a href="#">Permanent Forum on International Pharmaceutical Crime</a>                |                                                                 | <a href="#">Minilabs save lives</a>                                                                             |
|                                                              | <a href="#">PhaReD Foundation - Home</a>                                             |                                                                 | <a href="#">mPedigree Network Bringing Quality To Life</a>                                                      |
|                                                              | <a href="#">Pharmelp Detection of counterfeit medicines</a>                          |                                                                 | <a href="#">Innovative Global Partnerships Against Fake Drugs</a>                                               |
|                                                              | <a href="#">ReMeD-Réseau Médicaments &amp; Développement</a>                         |                                                                 | <a href="#">Pharmabiz</a>                                                                                       |
|                                                              | <a href="#">Safe Medicines India</a>                                                 |                                                                 | <a href="#">PharmaSecure</a>                                                                                    |
|                                                              | <a href="#">Safemedicines Protecting the Safety of America's Drug Supply</a>         |                                                                 | <a href="#">Sproxil Protecting Brands Globally</a>                                                              |
|                                                              | <a href="#">The Medicrime Convention</a>                                             |                                                                 | <a href="#">Association Développement et Santé</a>                                                              |
| <a href="#">Third World Network (TWN)</a>                    | <a href="#">ContrefaçonRiposte</a>                                                   |                                                                 |                                                                                                                 |
| <a href="#">USP Promoting the Quality of Medicines (PQM)</a> |                                                                                      |                                                                 |                                                                                                                 |
| <b>Academic/ Research Initiatives</b>                        | <a href="#">QUAMED - Quality Medicines for All</a>                                   | <b>Newspaper websites with interest in</b>                      | <a href="#">allafrica.com</a>                                                                                   |
|                                                              | <a href="#">IRASEC- Institut de Recherche sur l'Asie du Sud-Est Contemporaine</a>    |                                                                 | <a href="#">Daily Monitor - Uganda News, Politics, Business, Travel, Health, Sports, News Paper, technology</a> |
|                                                              |                                                                                      |                                                                 | <a href="#">Ghanaweb</a>                                                                                        |
|                                                              |                                                                                      |                                                                 | <a href="#">L'ESSOR journal Mali</a>                                                                            |

|                                |                                                                                                                    |                         |                                               |
|--------------------------------|--------------------------------------------------------------------------------------------------------------------|-------------------------|-----------------------------------------------|
| <b>Pharmaceutical Industry</b> | <a href="#">Sanofi</a>                                                                                             | <b>medicine quality</b> | <a href="#">ModernGhana</a>                   |
|                                | <a href="#">Les entreprises du médicament</a>                                                                      |                         | <a href="#">Nigerian Tribune</a>              |
|                                | <a href="#">Pfizer Pharmaceutical News and Media Pfizer One of the world's premier biopharmaceutical companies</a> |                         | <a href="#">Rapideinfo-Journal Mauritanie</a> |
|                                | <a href="#">PSI-Inc.org</a>                                                                                        |                         | <a href="#">THE HANS INDIA</a>                |
