# Supplementary material for: The quality of antiretroviral medicines: an uncertain problem
Source: HighWire-hosted journal article supplement (doi:10.1136/bmjgh-2022-011423), 2023-03-01
Supplement: bmjgh-2022-011423supp006_data_supplement.pdf [file bmjgh-2022-011423supp006_data_supplement.pdf]

## Supplementary file 6: Main Characteristics of prevalence surveys of antiretroviral medicines

| Reference / country of collection                                            | Active pharmaceutical ingredient (API)                                                                               | Brand name                                                                                   | Outlet/ Sampling type                   | Reference specifications standard                         | Test (s) performed and main analytical technique                                                           | No. Failed n (%) |
|------------------------------------------------------------------------------|----------------------------------------------------------------------------------------------------------------------|----------------------------------------------------------------------------------------------|-----------------------------------------|-----------------------------------------------------------|------------------------------------------------------------------------------------------------------------|------------------|
| Penzak, S.R. 2003 [1] Kenya, Lithuania, Zambia, South Africa                 | Nevirapine                                                                                                           | Triomune 40<br>Nevimune(200)<br>Nevirex<br>Viramune (Nev 200)<br>Triomune 30                 | Private pharmacy/<br>Convenience        | Unspecified                                               | API content<br><br><i>High-performance liquid chromatography /ultraviolet (HPLC-UV)</i>                    | 0 /6 (0.0%)      |
| Ramachandran, G. 2004 [2] Zimbabwe, South Africa, Lithuania, Jamaica, Zambia | Efavirenz<br>Indinavir<br>Lopinavir-ritonavir<br>Amprenavir<br>Ritonavir<br>Saquinavir soft-gel capsules             | Sustiva<br>Stocrin<br>Crixivan<br>Indivex-400<br>Kaletra<br>Agenerase<br>Norvir<br>Fortovase | Unspecified/<br>Convenience             | United States Pharmacopeia (USP) /National Formulary      | API content<br><br><i>HPLC-UV</i>                                                                          | 3/12 (25.0%)     |
| Ramachandran, G, 2004 [3] India                                              | Lamivudine-Nevirapine-<br>Stavudine<br>Efavirenz<br>Nevirapine<br>Zidovudine<br>Stavudine<br>Lamivudine<br>Didanosin | Unspecified                                                                                  | Manufacturer/<br>Convenience            | Unspecified                                               | API content<br><br><i>HPLC-UV</i>                                                                          | 0/17 (0.0%)      |
| Ciss, M. 2006 [4] Senegal                                                    | Stavudine<br>Nevirapine<br>Indinavir                                                                                 | Unspecified                                                                                  | Combination of outlets /<br>Convenience | USP + European Pharmacopeia + International Pharmacopoeia | API content<br><br><i>HPLC-unknown detector</i>                                                            | 1/12 (8.3%)      |
| M.H.Chambuso, 2006 [5] Tanzania                                              | Indinavir<br>Stavudine                                                                                               | Unspecified                                                                                  | Private pharmacy/<br>Unspecified        | British Pharmacopoeia (BP) + USP                          | API content, API identification, Dissolution, Visual inspection<br><br><i>UV-visible spectrophotometry</i> | 4/5 ( 80.0%)     |
| WHO, 2007 [6] Uganda, Tanzania,                                              | Didanosin, Efavirenz,<br>Lamivudine, Nevirapine,<br>Stavudine, Zidovudine,                                           | Unspecified                                                                                  | Combination of outlets /<br>Random      | Brazilian Pharmacopeia, USP 2008                          | API content, Content uniformity, Dissolution, weight, Visual inspection, impurity, API identification      | 8/394 (2.0%)     |

| Reference / country of collection                                  | Active pharmaceutical ingredient (API)                                                                                                                                                                                                                                                                                                      | Brand name  | Outlet/ Sampling type                 | Reference specifications stassindard | Test (s) performed and main analytical technique                                                                 | No. Failed n (%) |
|--------------------------------------------------------------------|---------------------------------------------------------------------------------------------------------------------------------------------------------------------------------------------------------------------------------------------------------------------------------------------------------------------------------------------|-------------|---------------------------------------|--------------------------------------|------------------------------------------------------------------------------------------------------------------|------------------|
| Democratic Republic of the Congo, Zambia, Kenya, Nigeria, Cameroon | Lamivudine-Zidovudine, Lamivudine-Nevirapine-Stavudine                                                                                                                                                                                                                                                                                      |             |                                       |                                      | <i>HPLC-UV/Vis</i>                                                                                               |                  |
| Sarr, S. O. 2008 [7] Senegal                                       | Didanosin<br>Indinavir<br>Lamivudine<br>Nevirapine<br>Stavudine<br>Zidovudine                                                                                                                                                                                                                                                               | Unspecified | Hospital/health centres / Convenience | Unspecified                          | API content (semi-quantitation), Disintegration, Visual inspection<br><br><i>Thin Layer Chromatography (TLC)</i> | 7/43 (16.3%)     |
| Musoke. D 2008 [8] Uganda                                          | Lamivudine-Nevirapine-Stavudine                                                                                                                                                                                                                                                                                                             | Unspecified | Hospital/health centres / Random      | USP                                  | API content, Visual inspection, dissolution<br><br><i>HPLC-Ultra-Violet</i>                                      | 0/14 (0.0%)      |
| Munkombwe, D 2010 [9] Zambia                                       | Nevirapine<br>Lamivudine-Nevirapine-Stavudine<br>Efavirenz<br>Lamivudine-Stavudine                                                                                                                                                                                                                                                          | Unspecified | Government outlets/ Random            | BP + USP                             | API content, API identification<br><br><i>TLC</i>                                                                | 1/11 (9.1%)      |
| NASCOP 2012 [10] Kenya                                             | Abacavir<br>Abacavir-Lamivudine<br>Didanosin<br>Efavirenz<br>Emtricitabine-Efavirenz-<br>Tenofovir Disoproxil<br>Lamivudine<br>Lamivudine-Stavudine<br>Lamivudine-Nevirapine-Stavudine<br>Lamivudine-Zidovudine<br>Lamivudine-Zidovudine-Nevirapine<br>Nevirapine<br>Stavudine<br>Tenofovir Disoproxil<br>Tenofovir disoproxil – Lamivudine | Unspecified | Combination of outlets / Convenience  | BP + USP                             | API content, Dissolution, weight, Friability<br><br><i>HPLC- Unknown detector</i>                                | 1/284 (0.4%)     |

| Reference country / of collection                                                                               | Active pharmaceutical ingredient (API)              | Brand name                                                                                   | Outlet/ Sampling type                                                                      | Reference specifications stassindard                                 | Test (s) performed and main analytical technique                                                                                                    | No. Failed n (%) |
|-----------------------------------------------------------------------------------------------------------------|-----------------------------------------------------|----------------------------------------------------------------------------------------------|--------------------------------------------------------------------------------------------|----------------------------------------------------------------------|-----------------------------------------------------------------------------------------------------------------------------------------------------|------------------|
|                                                                                                                 | Zidovudine<br>Lopinavir-Ritonavir                   |                                                                                              |                                                                                            |                                                                      |                                                                                                                                                     |                  |
| Chigunta, M.[11] 2013<br>Zambia                                                                                 | Nevirapine                                          | Unspecified                                                                                  | Combination of outlets/<br>Convenience                                                     | USP                                                                  | API content , API identification, Visual inspection<br><br><i>HPLC – unknown detector</i>                                                           | 0/9 (0.0%)       |
| Krech. L.A. 2014 [12]<br>Cambodia                                                                               | Lamivudine-Nevirapine-<br>Stavudine                 | Unspecified                                                                                  | Combination of outlets/<br>Convenience                                                     | USP and<br>Cambodia<br>Pharmacopeia                                  | Visual inspection, API content , API identification, Impurity, Disintergration<br><br><i>HPLC, TLC</i>                                              | 1/7 (14.3%)      |
| Wang, T. 2015 [13]<br>Thailand,<br>Nigeria,<br>Ethiopia, China,<br>United States of<br>America, South<br>Africa | Lamivudine<br>Nevirapine<br>Zidovudine<br>Efavirenz | Unspecified                                                                                  | Government outlets, Non-governmental organization, Website, Private pharmacy / Convenience | USP                                                                  | API content, Visual inspection, Impurity<br><br><i>HPLC-UV</i>                                                                                      | 6/46 (13.0%)     |
| Sapsirisavat, V. 2016 [14]<br>Thailand, Viet Nam                                                                | Lopinavir-Ritonavir<br>Tenofovir<br>Efavirenz       |                                                                                              | Combination of outlets / Random and convenience                                            | WHO<br>International<br>Pharmacopoeia                                | API content, API identification, Uniform of mass, Dissolution<br><br><i>Pharmacopeial techniques followed, no detail of the specific techniques</i> | 0/42 (0.0%)      |
| Kamangu, E.N. 2017 [15]<br>Democratic Republic of the Congo                                                     | Abacavir<br>Zidovudine<br>Efavirenz<br>Nevirapine   | Nevipan (200)<br>Nevimune (200)<br>Nevirapine (200)<br>EstivaN<br>Aviroz<br>Abacavir sulfate | Hospital/health centres / Convenience                                                      | European Pharmacopoeia, BP, International Pharmacopoeia 6th Edition. | API content, Disintegration, Friability<br><br><i>UV-visible spectrophotometry</i>                                                                  | 1/10 (10.0%)     |
| WHO 2017 [16]<br>Burkina Faso,<br>Democratic Republic of the                                                    | Unspecified                                         | Unspecified                                                                                  | Combination of outlets / Convenience                                                       | BP+USP+<br>International<br>Pharmacopoeia                            | Where applicable: Appearance, API identification, API content , Weight variation, Dissolution, Impurity, Related substances, Fineness of            | 1/126 (0.8%)     |

| Reference / country of collection        | Active pharmaceutical ingredient (API)                                                                                                                                                                                                                                                                                                                                                                              | Brand name  | Outlet/ Sampling type                           | Reference specifications standard                        | Test (s) performed and main analytical technique                                                                                                                                                                                                                                                                                                | No. Failed n (%) |
|------------------------------------------|---------------------------------------------------------------------------------------------------------------------------------------------------------------------------------------------------------------------------------------------------------------------------------------------------------------------------------------------------------------------------------------------------------------------|-------------|-------------------------------------------------|----------------------------------------------------------|-------------------------------------------------------------------------------------------------------------------------------------------------------------------------------------------------------------------------------------------------------------------------------------------------------------------------------------------------|------------------|
| Congo (DRC), Nigeria, Rwanda and Zambia. |                                                                                                                                                                                                                                                                                                                                                                                                                     |             |                                                 |                                                          | dispersion, Water content – no details on results per test<br><br><i>TLC, HPLC -unknown detector, IR (depending on API and formulation)</i>                                                                                                                                                                                                     |                  |
| Djobet. M.P.N 2017 [17] Cameroon         | Efavirenz<br>Lamivudine-Stavudine<br>Nevirapine<br>Lamivudine-Zidovudine-Nevirapine<br>Lamivudine-Zidovudine                                                                                                                                                                                                                                                                                                        | Unspecified | Combination of outlets / Convenience            | USP                                                      | API content , API identification, Visual inspection, Disintegration<br><br><i>UV Spectrophotometry<br/>TLC</i>                                                                                                                                                                                                                                  | 0/35 (0.0%)      |
| Wang, X 2019 [18] United Kingdom         | Emtricitabine-Tenofovir Disoproxil                                                                                                                                                                                                                                                                                                                                                                                  | Unspecified | Website , Hospital/health centers / Convenience | Unspecified                                              | API content , API identification<br><br><i>Ultra-Performance Liquid Chromatography (UPLC)</i>                                                                                                                                                                                                                                                   | 0/16 (0.0%)      |
| Mziray S 2021 [19] Tanzania              | Efavirenz<br>Nevirapine<br>Lamivudine<br>Zidovudine<br>Tenofovir Disoproxil Fumarate<br>Lamivudine/Zidovudine<br>Abacavir Sulphate<br>Lopinavir/Ritonavir<br>Tenofovir Disoproxil Fumarate<br>/Emtricitabin<br>Tenofovir Disoproxil Fumarate /Lamivudine/<br>Efavirenz<br>Lamivudine/Zidovudine/<br>Nevirapine<br>Lamivudine/Stavudine/<br>Nevirapine<br>Tenofovir Disoproxil Fumarate /Efavirenz/<br>Emtricitabine | Unspecified | Combination of outlets / Convenience            | USP or manufacturer's methods or in-house specifications | API content, API identification, Disintegration, Dissolution, Visual inspection, Related substances, Weight uniformity<br><br><i>TLC and HPLC</i><br><br><i>Tier analysis:<br/>Tier 1 : screening testing using the GPHF-Minilab<br/>Tier 2 : samples failing Tier 1 and 10% samples not failing Tier 1 followed full pharmacopeial testing</i> | 17/2630 (0.6%)   |

| Reference country of collection                                                                                                                                                                               | Active pharmaceutical ingredient (API) | Brand name | Outlet/ Sampling type | Reference specifications standard | Test (s) performed and main analytical technique | No. Failed n (%) |
|---------------------------------------------------------------------------------------------------------------------------------------------------------------------------------------------------------------|----------------------------------------|------------|-----------------------|-----------------------------------|--------------------------------------------------|------------------|
| HPLC, High-performance liquid chromatography; IR, Infrared; UV, Ultraviolet; TLC, Thin Layer Chromatography; BP, British Pharmacopeia; USP, United States Pharmacopeia; API, Active Pharmaceutical Ingredient |                                        |            |                       |                                   |                                                  |                  |

- 1 Penzak SR, Acosta EP, Turner M, *et al.* Analysis of Generic Nevirapine Products in Developing Countries. *J Am Med Assoc* 2003;**289**:2648–9. doi:10.1001/jama.289.20.2648-c
- 2 Penzak SR, Acosta EP, Turner M, *et al.* Antiretroviral Drug Content in Products from Developing Countries. *Clin Infect Dis* 2004;**38**:1317–9. doi:10.1086/383575
- 3 Ramachandran G, Perloff ES, Von Moltke LL, *et al.* Analysis of generic antiretroviral formulations manufactured in India. *AIDS*. 2004;**18**:1482–4. doi:10.1097/01.aids.0000131346.76289.27
- 4 Ciss M. Une démarche qualité pour le contrôle des médicaments: Cas des ARV. 22/03/2006 Pr M. - PDF Free Download. <https://docplayer.fr/21057770-Laboratoire-national-de-contrôle-des-médicaments-une-démarche-qualité-pour-le-contrôle-des-médicaments-cas-des-arv-22-03-2006-pr-m.html> (accessed 2 Jun 2020).
- 5 Chambuso MH, Ngassapa OD, Sayi JG, *et al.* Quality of antiretroviral drugs, stavudine and indinavir capsules available in the Tanzanian market. *Tanzania Med J* 2006;**21**:8–12. doi:10.4314/TMJ.V21I1.39202
- 6 WHO. Survey of the quality of antiretroviral medicines circulating in selected African countries. <https://extranet.who.int/prequal/content/> (accessed 2 Jun 2020).
- 7 Sarr SO. Control of the Quality of Antiretroviral Medicines Used in Senegal. 2008.<https://pubmed.ncbi.nlm.nih.gov/19626794/> (accessed 2 Jun 2020).
- 8 David Musoke. Assessment of the drug storage facilities and quality of generic co-formulation tablets (stavudine, lamivudine, nevirapine) at HIV/AIDS treatment centers in Uganda. [https://www.researchgate.net/publication/289843470\\_Assessment\\_of\\_the\\_drug\\_storage\\_facilities\\_and\\_quality\\_of\\_generic\\_co](https://www.researchgate.net/publication/289843470_Assessment_of_the_drug_storage_facilities_and_quality_of_generic_co)

- formulation\_tablets\_stavudine\_lamivudine\_nevirapine\_at\_HIVAIDS\_treatment\_centers\_in\_Uganda (accessed 2 Jun 2020).
- 9 Munkombwe D. Quality analysis of some first-line HIV/AIDS medicines dispensed in Lusaka District Health facilities of Zambia. Published Online First: 16 November 2011.<http://palevel.unza.zm/handle/123456789/897> (accessed 2 Jun 2020).
  - 10 NASCOP. Post Market Survey of Antiretroviral Medicines in Kenya. [https://drive.google.com/file/d/1KIPAstp8su82rS\\_bTWfMfmRSRDL93QbM/view](https://drive.google.com/file/d/1KIPAstp8su82rS_bTWfMfmRSRDL93QbM/view) (accessed 2 Jun 2020).
  - 11 Chigunta MM. Quality analysis of selected Pediatric HIV/AIDS/TB Medicines in Livingstone District, Zambia. Published Online First: 4 February 2014.<http://dspace.unza.zm:8080/xmlui/bitstream/handle/123456789/3188/Chigunta.pdf?sequence=1> (accessed 2 Jun 2020).
  - 12 Christi Lane LAK. Cambodian Ministry of Health Takes Decisive Actions in the Fight against Substandard and Counterfeit Medicines. *Trop Med Surg* 2014;**02**. doi:10.4172/2329-9088.1000166
  - 13 Wang T, Hoag SW, Eng ML, *et al*. Quality of antiretroviral and opportunistic infection medications dispensed from developing countries and Internet pharmacies. *J Clin Pharm Ther* 2015;**40**:68–75. doi:10.1111/jcpt.12226
  - 14 Sapsirisavat V, Vongsutilers V, Thammajarak N, *et al*. Pharmaceutical Equivalence of Distributed Generic Antiretroviral (ARV) in Asian Settings: The Cross-Sectional Surveillance Study – PEDA Study. *PLoS One* 2016;**11**:e0157039. doi:10.1371/JOURNAL.PONE.0157039
  - 15 Kamangu EN, Mbinze JK, Mingu AM, *et al*. UV Visible Spectrophotometric Determination of the Quality of Antiretroviral Drugs Distributed in Kinshasa. *OALib* 2017;**04**:1–8. doi:10.4236/oalib.1102923
  - 16 World Health Organization. Survey of the quality of selected antiretroviral medicines circulating in five African countries. Published Online First: 2017.<https://extranet.who.int/prequal/content/> (accessed 2 Jun 2020).
  - 17 Djobet MPN, Singhe D, Lohoue J, *et al*. Antiretroviral therapy supply chain quality control and assurance in improving people living with HIV therapeutic

- outcomes in Cameroon. *AIDS Res Ther* 2017;**14**:19. doi:10.1186/s12981-017-0147-x
- 18 Wang X, Nutland W, Brady M, *et al.* Quantification of tenofovir disoproxil fumarate and emtricitabine in generic pre-exposure prophylaxis tablets obtained from the internet. *Int J STD AIDS* 2019;**30**:765–8. doi:10.1177/0956462419841144
- 19 Mziray S, Maganda BA, and ... KM-BMCP, *et al.* Quality of selected anti-retroviral medicines: Tanzania Mainland market as a case study. *Springer*<https://link.springer.com/article/10.1186/s40360-021-00514-w>
