# Supplementary material for: The quality of antiretroviral medicines: an uncertain problem
Source: HighWire-hosted journal article supplement (doi:10.1136/bmjgh-2022-011423), 2023-03-01
Supplement: bmjgh-2022-011423supp010_data_supplement.pdf [file bmjgh-2022-011423supp010_data_supplement.pdf]

## Supplementary file 10. Frequency of agreement with the 26 items of the MEDQUARG checklist of the 15 prevalence surveys

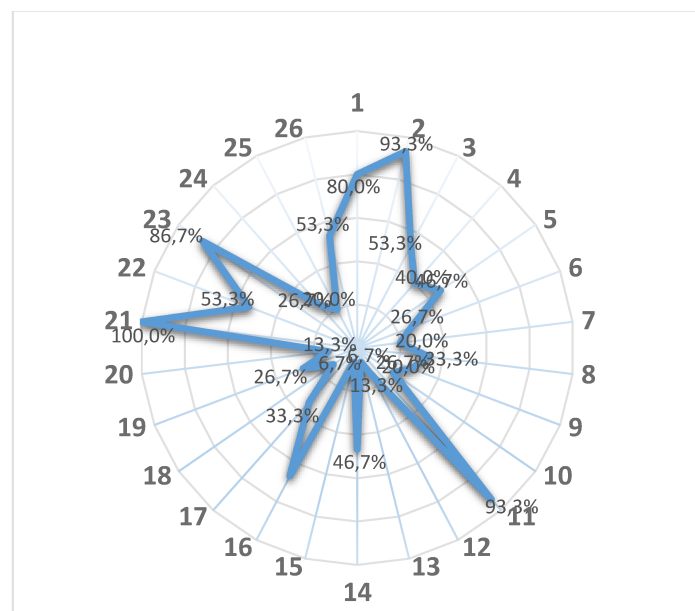

Definition of items: 1. Title/abstract/keywords 2. Introduction.

Methods (items 3-13): 3. Survey details 4. Definitions 5. Outlets 6. Sampling design 7. Samplers 8. Statistical methods 9. Ethical issues 10. Packaging 11. Chemical analysis 12. Method validation 13. Blinding. Results (items 14-20): 14. Outlets (actual) 15. Missing samples 16. Packaging and chemistry results 17. Category of poor quality medicine 18. State company and address as given on packaging 19. Sharing data with MRA 20. Dissemination. Discussion (items 21-24): 21. Key results 22. Limitations 23. Interpretation 24. Intervention. Declaration: 25. Conflict of interest 26. Funding.

| No             | Item                    | Penzak, S.R. et al, 2004 | M.H.S. Chambuso et al, 2006 | WHO, 2007 | Musoke. D et al, 2008 | Sarr, S. O. et al, 2008 | NASCOP, 2012 | Chigunta, M.M. et al, 2013 |
|----------------|-------------------------|--------------------------|-----------------------------|-----------|-----------------------|-------------------------|--------------|----------------------------|
| 1              | Title/abstract/keywords | N                        | N                           | Y         | Y                     | Y                       | N            | Y                          |
| 2              | Introduction            | Y                        | Y                           | Y         | Y                     | Y                       | Y            | Y                          |
| <b>Methods</b> |                         |                          |                             |           |                       |                         |              |                            |
| 3              | Survey details          | N                        | N                           | Y         | Y                     | N                       | Y            | Y                          |
| 4              | Definitions             | N                        | Y                           | N         | N                     | N                       | Y            | Y                          |
| 5              | Outlets                 | N                        | N                           | Y         | Y                     | N                       | N            | N                          |

| No                       | Item                                            | Penzak, S.R. et al, 2004 | M.H.S. Chambuso et al, 2006 | WHO, 2007    | Musoke. D et al, 2008 | Sarr, S. O. et al, 2008 | NASCOP, 2012 | Chigunta, M.M. et al, 2013 |
|--------------------------|-------------------------------------------------|--------------------------|-----------------------------|--------------|-----------------------|-------------------------|--------------|----------------------------|
| 6                        | Sampling design                                 | N                        | N                           | Y            | N                     | N                       | N            | Y                          |
| 7                        | Samplers                                        | N                        | N                           | Y            | N                     | N                       | N            | Y                          |
| 8                        | Statistical methods                             | Y                        | N                           | N            | Y                     | N                       | Y            | Y                          |
| 9                        | Ethical issues                                  | N                        | N                           | N            | Y                     | N                       | N            | Y                          |
| 10                       | Packaging                                       | N                        | Y                           | Y            | N                     | N                       | N            | N                          |
| 11                       | Chemical analysis                               | Y                        | Y                           | Y            | Y                     | N                       | Y            | Y                          |
| 12                       | Method validation                               | N                        | N                           | Y            | N                     | N                       | N            | N                          |
| 13                       | Blinding                                        | N                        | N                           | Y            | N                     | N                       | N            | N                          |
| <b>Results</b>           |                                                 |                          |                             |              |                       |                         |              |                            |
| 14                       | Outlets                                         | N                        | N                           | Y            | Y                     | Y                       | N            | N                          |
| 15                       | Missing samples                                 | N                        | N                           | N            | N                     | N                       | N            | N                          |
| 16                       | Packaging and chemistry results                 | Y                        | Y                           | Y            | N                     | N                       | N            | Y                          |
| 17                       | Category of poor-quality medicine               | N                        | N                           | N            | N                     | N                       | Y            | N                          |
| 18                       | State company and address as given on packaging | N                        | N                           | N            | N                     | N                       | N            | N                          |
| 19                       | Sharing data with MRA                           | N                        | N                           | N            | N                     | Y                       | Y            | N                          |
| 20                       | Dissemination                                   | N                        | N                           | N            | N                     | N                       | N            | Y                          |
| <b>Discussion</b>        |                                                 |                          |                             |              |                       |                         |              |                            |
| 21                       | Key results                                     | Y                        | Y                           | Y            | Y                     | Y                       | Y            | Y                          |
| 22                       | Limitations                                     | N                        | N                           | Y            | N                     | N                       | Y            | Y                          |
| 23                       | Interpretation                                  | Y                        | Y                           | Y            | N                     | N                       | Y            | Y                          |
| 24                       | Intervention                                    | N                        | N                           | N            | N                     | Y                       | Y            | N                          |
| <b>Other Information</b> |                                                 |                          |                             |              |                       |                         |              |                            |
| 25                       | Conflict of interest                            | N                        | N                           | N            | N                     | N                       | N            | N                          |
| 26                       | Funding                                         | N                        | N                           | N            | Y                     | N                       | Y            | N                          |
|                          | Total score                                     | <b>6</b>                 | <b>7</b>                    | <b>15</b>    | <b>10</b>             | <b>6</b>                | <b>12</b>    | <b>14</b>                  |
|                          |                                                 | <b>23.1%</b>             | <b>26.9%</b>                | <b>57.7%</b> | <b>38.5%</b>          | <b>23.1%</b>            | <b>46.2%</b> | <b>53.8%</b>               |

Y : Yes, N : No

| No                       | Item                                            | Krech. L.A et al, 2014 | Wang, T et al, 2015 | Sapsirisavat , V et al, 2016 | Djobet. M.P.N et al, 2017 | WHO, 2017 | Kamangu, E.N. et al 2017 | Wang, X et al, 2019 | Mziray S et al, 2021 |
|--------------------------|-------------------------------------------------|------------------------|---------------------|------------------------------|---------------------------|-----------|--------------------------|---------------------|----------------------|
| 1                        | Title/abstract/keywords                         | Y                      | Y                   | Y                            | Y                         | Y         | Y                        | Y                   | Y                    |
| 2                        | Introduction                                    | Y                      | Y                   | Y                            | Y                         | Y         | Y                        | N                   | Y                    |
| <b>Methods</b>           |                                                 |                        |                     |                              |                           |           |                          |                     |                      |
| 3                        | Survey details                                  | N                      | N                   | Y                            | Y                         | Y         | Y                        | N                   | N                    |
| 4                        | Definitions                                     | Y                      | Y                   | Y                            | N                         | N         | N                        | N                   | N                    |
| 5                        | Outlets                                         | Y                      | Y                   | Y                            | N                         | N         | Y                        | N                   | Y                    |
| 6                        | Sampling design                                 | N                      | N                   | Y                            | N                         | Y         | N                        | N                   | N                    |
| 7                        | Samplers                                        | N                      | Y                   | N                            | N                         | N         | N                        | N                   | N                    |
| 8                        | Statistical methods                             | N                      | N                   | N                            | Y                         | N         | N                        | N                   | N                    |
| 9                        | Ethical issues                                  | N                      | N                   | N                            | Y                         | N         | N                        | N                   | Y                    |
| 10                       | Packaging                                       | N                      | N                   | N                            | Y                         | N         | N                        | N                   | N                    |
| 11                       | Chemical analysis                               | Y                      | Y                   | Y                            | Y                         | Y         | Y                        | Y                   | Y                    |
| 12                       | Method validation                               | N                      | N                   | N                            | N                         | N         | N                        | N                   | Y                    |
| 13                       | Blinding                                        | N                      | N                   | N                            | N                         | N         | N                        | N                   | N                    |
| <b>Results</b>           |                                                 |                        |                     |                              |                           |           |                          |                     |                      |
| 14                       | Outlets                                         | N                      | N                   | Y                            | Y                         | N         | N                        | Y                   | Y                    |
| 15                       | Missing samples                                 | N                      | N                   | N                            | Y                         | N         | N                        | N                   | N                    |
| 16                       | Packaging and chemistry results                 | N                      | Y                   | Y                            | Y                         | Y         | Y                        | N                   | Y                    |
| 17                       | Category of poor-quality medicine               | N                      | N                   | Y                            | Y                         | Y         | Y                        | N                   | N                    |
| 18                       | State company and address as given on packaging | N                      | Y                   | N                            | N                         | Y         | N                        | N                   | N                    |
| 19                       | Sharing data with MRA                           | Y                      | N                   | N                            | N                         | N         | N                        | N                   | Y                    |
| 20                       | Dissemination                                   | N                      | N                   | N                            | N                         | N         | N                        | N                   | Y                    |
| <b>Discussion</b>        |                                                 |                        |                     |                              |                           |           |                          |                     |                      |
| 21                       | Key results                                     | Y                      | Y                   | Y                            | Y                         | Y         | Y                        | Y                   | Y                    |
| 22                       | Limitations                                     | Y                      | N                   | Y                            | Y                         | Y         | N                        | Y                   | N                    |
| 23                       | Interpretation                                  | Y                      | Y                   | Y                            | Y                         | Y         | Y                        | Y                   | Y                    |
| 24                       | Intervention                                    | Y                      | N                   | N                            | N                         | N         | N                        | N                   | Y                    |
| <b>Other Information</b> |                                                 |                        |                     |                              |                           |           |                          |                     |                      |

| No | Item                 | Krech. L.A et al, 2014 | Wang, T et al, 2015 | Sapsirisavat , V et al, 2016 | Djobet. M.P.N et al, 2017 | WHO, 2017    | Kamangu, E.N. et al 2017 | Wang, X et al, 2019 | Mziray S et al, 2021 |
|----|----------------------|------------------------|---------------------|------------------------------|---------------------------|--------------|--------------------------|---------------------|----------------------|
| 25 | Conflict of interest | N                      | N                   | Y                            | N                         | N            | N                        | Y                   | Y                    |
| 26 | Funding              | N                      | Y                   | Y                            | Y                         | N            | Y                        | Y                   | Y                    |
|    | Total score          | <b>10</b>              | <b>11</b>           | <b>15</b>                    | <b>15</b>                 | <b>11</b>    | <b>10</b>                | <b>8</b>            | <b>15</b>            |
|    |                      | <b>38.5%</b>           | <b>42.3%</b>        | <b>57.7%</b>                 | <b>57.7%</b>              | <b>42.3%</b> | <b>38.5%</b>             | <b>30.8%</b>        | <b>57.7%</b>         |

Y : Yes, N : No
